# Supplementary material
Source: HighWire-hosted journal article supplement (https://erj.ersjournals.com/content/56/4/2002628)
Supplement: inline-supplementary-material-1 [file inline-supplementary-material-1.pdf]

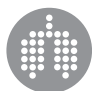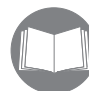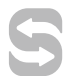

SHAREABLE PDF

# Modernising case finding for $\alpha_1$ -antitrypsin deficiency by DNA sequencing of COPD patients

Mark Quinn<sup>1</sup> and Alice M. Turner <sup>1,2</sup>

**Affiliations:** <sup>1</sup>IAHR, University of Birmingham, Birmingham, UK. <sup>2</sup>University Hospitals Birmingham, Birmingham, UK.

**Correspondence:** Mark Quinn, University of Birmingham, Institute of Applied Health Research, Birmingham, B15 2TT, UK. E-mail: M.Quinn@bham.ac.uk

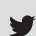

@ERSpublications

**Commenting on the use of DNA sequencing in helping to reduce the reported under-diagnosing of alpha-1-antitrypsin deficiency** <https://bit.ly/2ZPZbjx>

**Cite this article as:** Quinn M, Turner AM. Modernising case finding for  $\alpha_1$ -antitrypsin deficiency by DNA sequencing of COPD patients. *Eur Respir J* 2020; 56: 2002628 [<https://doi.org/10.1183/13993003.02628-2020>].

This single-page version can be shared freely online.

Alpha-1-antitrypsin deficiency (AATD) is a hereditary metabolic disorder caused by mutations in the SERPINA1 gene that result in a reduction in the serum concentration of the protein alpha-1-antitrypsin (AAT), and a predisposition to COPD [1]. AAT functions as an inhibitor of neutrophil elastase (and other proteases) and is essential in maintaining a balance of protease and antiprotease activity in the lungs [2]. Imbalance causes an escalating cycle of inflammation and degradation of lung tissue that, over time, leads to COPD [3].
